# Supplementary material for: Benzofuranyl Esters: Synthesis, Crystal Structure Determination, Antimicrobial and Antioxidant Activities
Source: Molecules. 2015 Sep 11;20(9):16566–81. doi: 10.3390/molecules200916566 (PMC6332186; doi:10.3390/molecules200916566)
Supplement: Supplementary file 1 [file molecules-20-16566-s001.pdf]

# Supplementary Information

## Additional Part for X-ray Crystal Structure Description

C–H $\cdots\pi$  interactions are observed between two inversion-related molecules in **4a**, involving the centroids of five-membered and six-membered rings of benzofuran moiety as shown in Figure S1. In **4b**, the zigzag chains are stacked along *b*-axis (Figure S2) under weak  $\pi\cdots\pi$  interactions (3.9162 (16) Å;  $-x, -y, -z$ ) in between O1*A*/C1*A*/C6*A*/C7*A*/C8*A* and C12*A*–C17*A* rings. Two C–H $\cdots\pi$  interactions are observed in the crystal of **4c** (Figure S3). One of the interactions is formed in between two parallel-displaced phenyl ring whereas the other one formed edge-to-face interaction. Two  $\pi\cdots\pi$  interactions are observed in between two benzofuran rings with equal centroid-to-centroid distance of 3.6111 (4) Å (symmetry code  $-x + 1, -y + 1, -z$ ). For **4d**,  $\pi\cdots\pi$  interactions are observed in between two benzofuran rings (centroid-to-centroid distance = 3.5820 (3) Å,  $-x, -y + 2, -z$ ) which are similar to **4c**. Two C–H $\cdots\pi$  interactions (Figure S4) are formed in between the sheets which further consolidate the interaction pattern into a three-dimensional network. The molecules in **4e** are linked by weak C–H $\cdots$ O hydrogen bonds (Table S1) into two-dimensional sheets parallel to *ac*-plane. Figure S5a,b show sheets *A* and *B* which are fully comprised of molecule *A* or molecule *B*, respectively. Weak C–H $\cdots$ O and  $\pi\cdots\pi$  interactions (Table S2) link the hydrogen bonded sheets in ...*AA*<sub>*inv*</sub>*BB*<sub>*inv*</sub>... pattern along *b*-direction into a three-dimensional network (Figure S6). Sheet *A*<sub>*inv*</sub> is an inversion of sheet *A* and the same applies to *B*<sub>*inv*</sub>.

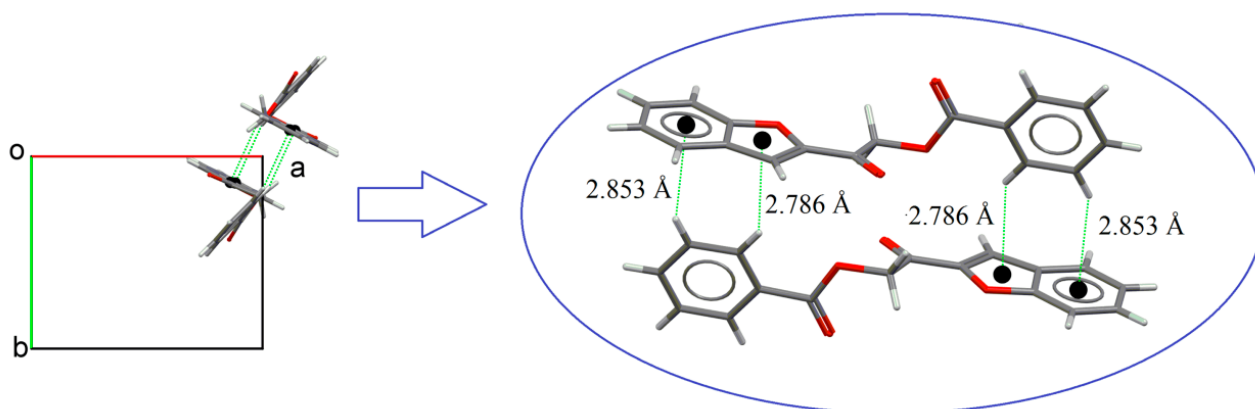

**Figure S1.** C–H $\cdots\pi$  interactions (green dotted lines) are observed in between two inversion-related molecules of **4a** with H $\cdots$ centroid distances of 2.79 Å and 2.85 Å.

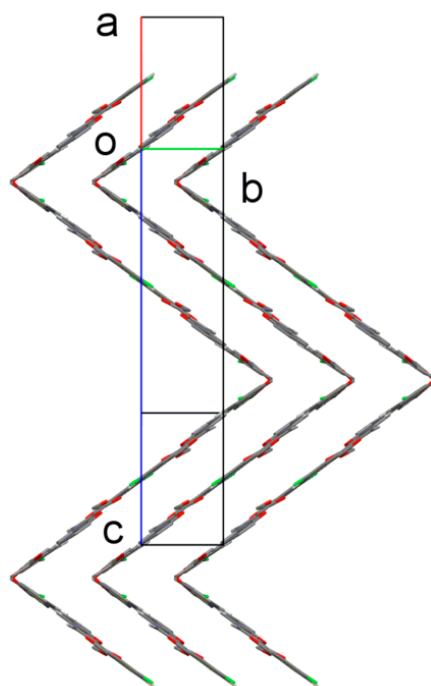

**Figure S2.** Partial packing diagram of **4b** shows three zigzag chains viewed along *a*-axis.

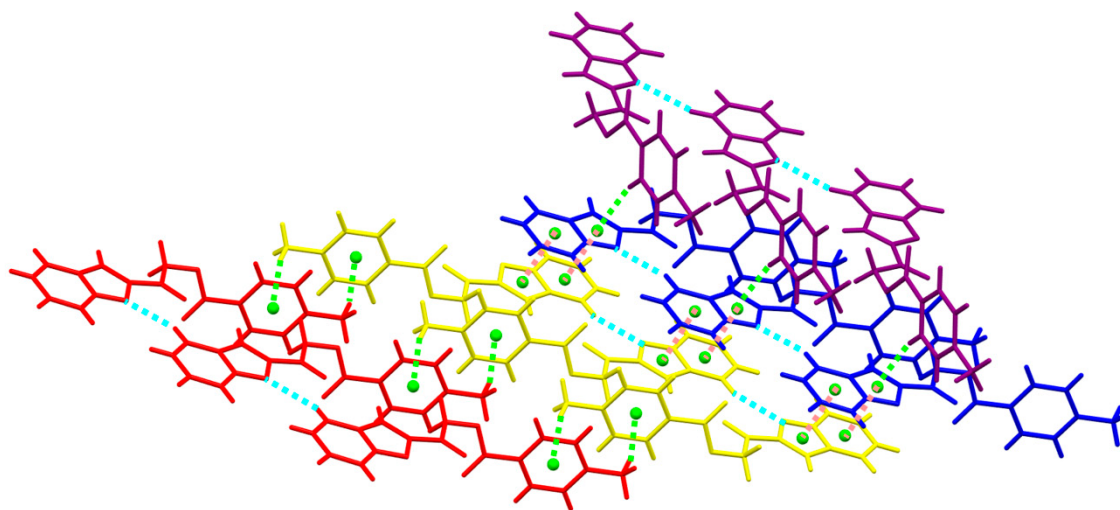

**Figure S3.** C–H $\cdots$ O hydrogen bonds (cyan dotted lines), C–H $\cdots$  $\pi$  (green dotted lines) and  $\pi\cdots\pi$  (pink dotted lines) interactions contribute to the formation of the three-dimensional network in **4c**. Each hydrogen-bonded chain is drawn in different colours.

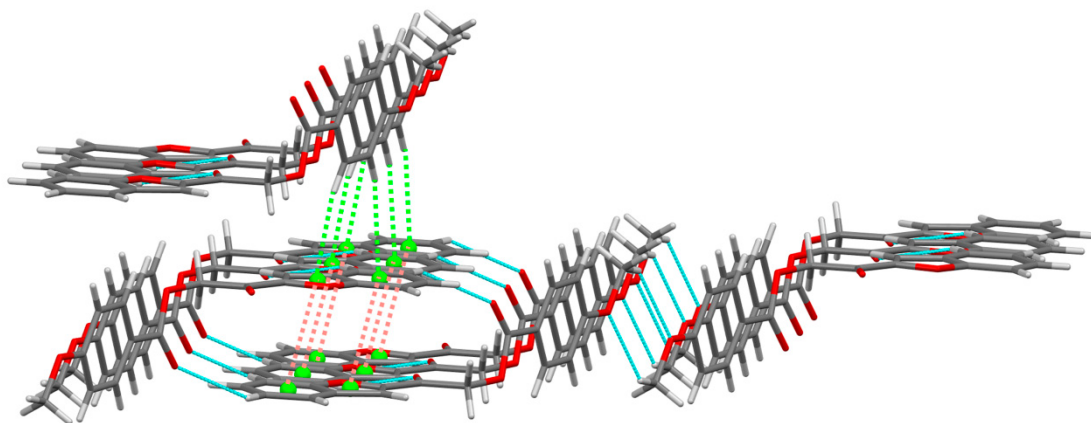

**Figure S4.** Cyan dotted lines show C–H $\cdots$ O hydrogen bond whereas green and pink dotted lines show C–H $\cdots$  $\pi$  and  $\pi\cdots\pi$  interactions, respectively in **4d**.

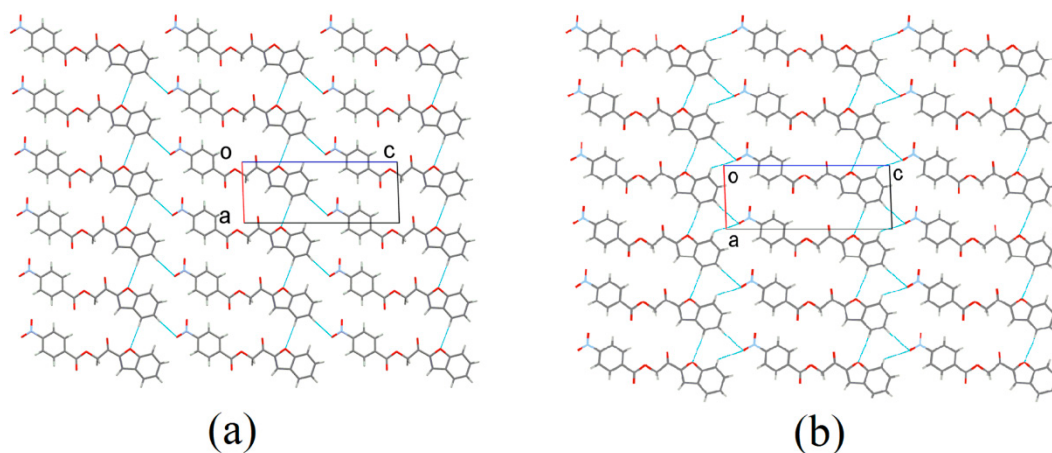

**Figure S5.** C–H $\cdots$ O hydrogen bond interactions (blue dotted lines) form two-dimensional sheets *A* (a) and *B* (b) parallel to *ac*-plane.

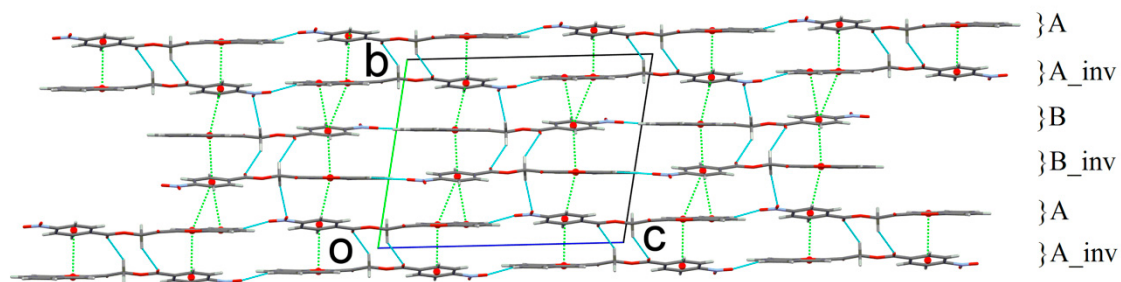

**Figure S6.** Three-dimensional view of C–H $\cdots$ O hydrogen bonds (blue dotted lines) and  $\pi\cdots\pi$  interactions (green dotted lines) in **4e**.

**Table S1.** Hydrogen bond geometries for **4(a–e)**.

| <i>D–H···A</i>  | <i>D–H</i> (Å) | <i>H···A</i> (Å) | <i>D···A</i> (Å) | <i>D–H···A</i> (°) | Symmetry Code                 |
|-----------------|----------------|------------------|------------------|--------------------|-------------------------------|
| <b>4a</b>       |                |                  |                  |                    |                               |
| C4–H4A···O4     | 0.93           | 2.54             | 3.368 (2)        | 148                | $-x + 3/2, y - 1/2, -z + 1/2$ |
| C10–H10A···O4   | 0.97           | 2.60             | 3.445 (2)        | 145                | $x + 2, -y + 1, -z$           |
| C14–H14A···O3   | 0.93           | 2.69             | 3.312 (3)        | 125                | $-x + 3/2, y + 1/2, -z - 1/2$ |
| C16–H16A···Cg2  | 0.93           | 2.85             | 3.6715 (19)      | 147                | $-x + 2, -y, -z$              |
| C17–H17A···Cg1  | 0.93           | 2.79             | 3.5489 (17)      | 140                | $-x + 2, -y, -z$              |
| <b>4b</b>       |                |                  |                  |                    |                               |
| C5B–H5B···O4A   | 0.93           | 2.58             | 3.347 (11)       | 139                | $x, y + 1, -z + 1/2$          |
| C7A–H7A···O3B   | 0.93           | 2.40             | 3.18 (2)         | 141                | $-x, y - 1, -z + 1/2$         |
| C14B–H14B···O4A | 0.93           | 2.52             | 3.237 (12)       | 134                | $x, y + 1, z$                 |
| C16A–H16A···O1A | 0.93           | 2.54             | 3.473 (3)        | 175                | $-x, -y + 1, -z$              |
| <b>4c</b>       |                |                  |                  |                    |                               |
| C5–H5A···O1     | 0.93           | 2.51             | 3.3903 (17)      | 158                | $x, y - 1, z$                 |
| C17–H17A···Cg1  | 0.93           | 2.68             | 3.5571 (17)      | 157                | $-x + 3/2, y + 1/2, -z + 1/2$ |
| C18–H18B···Cg3  | 0.96           | 2.78             | 3.7180 (19)      | 167                | $-x + 1, -y + 3, -z + 1$      |
| <b>4d</b>       |                |                  |                  |                    |                               |
| C4–H4A···O4     | 0.93           | 2.56             | 3.3026 (18)      | 137                | $-x, -y + 2, -z$              |
| C5–H5A···O3     | 0.93           | 2.53             | 3.3100 (18)      | 141                | $x - 1, y, z$                 |
| C18–H18A···O5   | 0.96           | 2.59             | 3.321 (2)        | 133                | $-x + 3, -y + 1, -z + 1$      |
| C16–H16A···Cg2  | 0.93           | 2.93             | 3.7004 (16)      | 141                | $-x + 1, -y + 1, -z$          |
| C17–H17A···Cg1  | 0.93           | 2.82             | 3.6435 (14)      | 148                | $-x + 1, -y + 1, -z$          |
| <b>4e</b>       |                |                  |                  |                    |                               |
| C4A–H4AA···O6A  | 0.93           | 2.70             | 3.619 (5)        | 169                | $x + 1, y, z + 1$             |
| C5A–H5AA···O1A  | 0.93           | 2.62             | 3.543 (4)        | 172                | $x + 1, y, z$                 |
| C10A–H10B···O4A | 0.97           | 2.64             | 3.488 (4)        | 146                | $-x + 1, -y, -z$              |
| C2B–H2BA···O5B  | 0.93           | 2.69             | 3.318 (4)        | 125                | $x, y, z - 1$                 |
| C4B–H4BA···O5B  | 0.93           | 2.66             | 3.583 (5)        | 174                | $x - 1, y, z - 1$             |
| C5B–H5BA···O1B  | 0.93           | 2.62             | 3.548 (4)        | 174                | $x - 1, y, z$                 |
| C10B–H10D···O4B | 0.97           | 2.68             | 3.532 (5)        | 146                | $-x + 1, -y + 1, -z + 1$      |

Cg1: O1/C1/C6/C7/C8, Cg2: C1–C6, Cg3: C12–C17.

**Table S2.**  $\pi \cdots \pi$  interactions in **4(b–e)**.

| Centroid 1 | Centroid 2 | Centroid-to-Centroid Distance (Å) | Symmetry Code            |
|------------|------------|-----------------------------------|--------------------------|
| <b>4b</b>  |            |                                   |                          |
| Cg1        | Cg2        | 3.9162 (16)                       | $-x, -y, -z$             |
| <b>4c</b>  |            |                                   |                          |
| Cg3        | Cg4        | 3.6111 (10)                       | $-x + 1, -y + 1, -z$     |
| <b>4d</b>  |            |                                   |                          |
| Cg3        | Cg4        | 3.5820 (8)                        | $-x, -y + 2, -z$         |
| <b>4e</b>  |            |                                   |                          |
| Cg1        | Cg2        | 3.7263 (19)                       | $-x, -y, -z$             |
| Cg1        | Cg7        | 3.7794 (19)                       | $-x + 1, -y + 1, -z + 1$ |
| Cg5        | Cg7        | 3.8710 (2)                        | $-x + 1, -y + 1, -z + 1$ |
| Cg2        | Cg6        | 3.9167 (19)                       | $-x + 1, -y + 1, -z$     |
| Cg6        | Cg7        | 3.7022 (19)                       | $-x + 2, -y + 1, -z + 1$ |

Cg1, Cg2, Cg3, Cg4, Cg5, Cg6 and Cg7 are the centroids of O1A/C1A/C6A/C7A/C8A, C12A–C17A, O1/C1/C6/C7/C8, C12–C17, C1A–C6A, O1B/C1B/C6B/C7B/C8B and C12B–C17B rings, respectively.
